# Supplementary material for: Extreme Oncoplastic Surgery for Multifocal/Multicentric and Locally Advanced Breast Cancer
Source: Hindawi journal article supplement (doi:10.1155/2019/4262589), 2019-02-20
Supplement: f1 [file 4262589.f1.pdf]

**Supplementary Table 1: Dose Received by Different Structures  
(For Representative Case Study)**

| <b>Structure</b>       | <b>Volume , cc</b> | <b>Maximum Dose, cGy</b> | <b>Mean Dose, cGy</b> |
|------------------------|--------------------|--------------------------|-----------------------|
| Planning Target Volume | 1041.8             | 4955.7                   | 4682.0                |
| Breast, Contralateral  | 1028               | 1074.7                   | 67.4                  |
| Heart                  | 632.2              | 4440.0                   | 693.2                 |
| Lung, Ipsilateral      | 1104.6             | 4536.9                   | 1694.6                |
| Lungs                  | 2420.2             | 4536.3                   | 923.0                 |

**Supplementary Table 2: RT data for EO Cohort**

| <b>Features</b>                                 | <b>Number</b> |
|-------------------------------------------------|---------------|
| Patients who received RT to whole breast        | 22            |
| Patients who received RT to whole breast + SCF  | 10            |
| Patients with left sided lesion                 | 18            |
| Patients with right sided lesion                | 14            |
| Patients treated by F-P FiF IMRT                | 27            |
| Patients treated by VMAT                        | 5             |
| Patients who were given SIB                     | 4             |
| Patients who were given electron boost          | 27            |
| Patients who were not given electron boost/ SIB | 1             |
